# Supplementary material
Source: PubMed Central journal article supplement (PMC2666582)

| name             | sequence                                                                     |
|------------------|------------------------------------------------------------------------------|
| GrxS12 for       | 5' <u>CCCCCCATGGCTTCCTTTGGGTCCAGGCTC</u> 3'                                  |
| GrxS12 rev       | 5' <u>CCCCGGATCCTTAGCCCTGTGACTTTT</u> TAGC 3'.                               |
| GrxS12 W28Y for  | 5' GTTTACTCCAAA <b>ACTT</b> ACTGTTCGTATTCTTCT 3'                             |
| GrxS12 W28Y rev  | 5' AGAAGAATACGAACAG <b>TAAG</b> TTTTGGAGTAAAC 3'                             |
| GrxS12 C29S for  | 5' TACTCCAAA <b>ACTT</b> GGAGCTCGTATTCTTCTGAG 3'                             |
| GrxS12 C29S rev  | 5' CTCAGAAGAATACGAGCTCCAAGTTTTGGAGTA-3'                                      |
| GrxS12 C87S for  | 5' AAACATATTGGTGGCAGCACAGATACTGTGAAA 3'                                      |
| GrxS12 C87S rev  | 5' TTTCACAGTATCTGT <b>GCT</b> GCCACCAATATGTTT 3'                             |
| GrxS12 YCGYC for | 5' GTAGTTTACTCCAAA <b>ACTT</b> ACTGTGGGTATTGTTTTGAGGTGAAGTCTTTG 3'           |
| GrxS12 YCGYC rev | 5' CAAAGACTTCACCTCA <b>AAACA</b> AATACCCACAG <b>TAAG</b> TTTTGGAGTAAACTAC 3' |
| GrxS12 pCK for   | 5' <u>CCCCCCATGGCAGACACACTC</u> AAAT 3'                                      |
| GrxS12 pCK rev   | 5' <u>CCCCGGATCCACTACA</u> ACTGGGTTCTCAGC 3'                                 |

Supplementary Table 1: **Primers used in this study.**

The *Nco*I and *Bam*HI cloning restriction sites are underlined in the primers. The mutagenic codons are in bold.

| Helices residues          | $\alpha 1$ | $\alpha 1'$ | $\alpha 2$ | $\alpha 3$ | $\alpha 4$ |
|---------------------------|------------|-------------|------------|------------|------------|
|                           | 5 – 19     | 31 – 44     | 58 – 69    | 87 – 95    | 98 – 107   |
| $\beta$ -Strands Residues | $\beta 1$  | $\beta 2$   | $\beta 3$  | $\beta 4$  |            |
|                           | 21 – 25    | 47 – 51     | 76 – 80    | 82 – 85    |            |

Supplementary Table 2: **Secondary structure elements of poplar GrxS12.**

At 69 SSGSTLEETVKKTVAENPVVVYSK**W**CSYSSQVKS**L**FKSLQVEPLVVELDQLGSEGS**Q**LQNVLEKI**T**GQY**T**VPNVFI**G**GKH**I**GGCSD**T**LQLHNK**G**ELEA**I**LAEANGKNGQT 179  
 Ptt 75 SFGSRLEDAVKKTVAENPVVVYSK**W**CSYSSEVKS**L**FKRLNVDPLVVELDELGAQGP**Q**IQVLE**R**L**T**GQHTVPNVFI**G**GKH**I**GGCTD**T**VKLYRK**G**ELE**P**LLSEANAKKSQ**G** 185  
 Pp 54 SFGSRLEESVKKTVDENPVVVYSK**W**CSYSSEVKS**L**FKRLGVEPMVIELDELGPQGP**Q**LQVLE**R**L**T**GQHTVPNVFI**A**GKH**I**GGCTD**T**VKLYRK**G**ELE**P**LLSEAKAKNAQ**S** 164  
 Md 70 SFGSRLEESVKKTVDENPVVVYSK**W**CSYSSEV**K**L**F**FKRLDVE**P**LVIELDELGPQGP**Q**LQVLE**R**L**T**GQHTVPNVFI**G**GKH**I**GGCTD**T**VKLYRT**G**ELE**T**LLSEASAKNTQ**S** 180  
 Cp 73 SFGSRLEESVKKTVADNPVVVYSK**W**CSYSSEV**K**L**F**FKRLGVE**P**LVIELDELGAQGP**Q**LQVLE**R**L**T**GQHTVPNVFI**G**GKH**I**GGCTD**T**IKLYRK**G**ELE**T**LLSEANAKNIQ**S** 183  
 Cs 66 SYGSRLEESVKKTVSENPVVVYSK**W**CSYSSEV**K**L**L**FKRLGVE**P**LVIELDEMGPQGP**Q**LQK**L**LE**R**L**T**GQHTVPNVFI**G**GKH**I**GGCTD**T**VKLYRK**G**ELE**P**LLSEAKSAEN-- 174  
 Pt 66 SFGSRLEESVKKTVSENPVVVYSK**W**CSYSSEV**K**L**L**FKRLGVE**P**LVIELDEMGPQGP**Q**LQK**L**LE**R**L**T**GQHTVPNVFI**G**GKH**I**GGCTD**T**VKLYRK**G**ELE**P**LLSEAKSAEN-- 174  
 Cr 68 SFGSRLEESVKKTVTDNPVVVYSK**W**CSYSSEVKS**L**FKRLDVEPLVIELDQLGPG**Q**P**Q**LQVLE**R**L**T**GQHTVPNVFI**G**GKH**I**GGCTD**T**VK**L**HR**G**DLE**P**LLSKASAKT**S** 178  
 In 75 SFGSRMEESVKKTVGENPVVVYSK**W**CSYSSEV**K**L**F**FKRLGVE**P**LVIELDEMGPQGP**Q**LQVLE**R**L**T**GQHTVPNVFI**G**GKH**I**GGCTD**T**IKLYRK**G**ELE**P**LLSEASARKT**S** 185  
 St 73 SFGSRLEESVKKTITENPVVVYSK**W**CSYS**T**EV**K**L**F**FKRLGVD**P**LVIELDEMGPQGP**Q**LQVLE**R**L**T**GQHTVPNVFI**G**AK**H**I**G**GCTD**T**IKLYRK**G**ELE**S**LLSEAKAGK**T**S 183  
 Nt 70 SFGSRLEESVKKTITENPVVVYSK**W**CSYSMEV**K**L**F**FKKLGV**D**PLVIELDEMGPQGP**Q**LQVLE**R**L**T**GQHTVPNVFI**G**AK**H**I**G**GCTD**T**IKLYRK**G**ELE**P**LLSEANAGK**T**S 180  
 Vv 69 SFGSRLEETVKKTVEENPVVVYSK**W**CSYSSEVKS**L**FKRLGVE**P**FVIELDEMGPQGP**Q**LQVLE**R**L**T**GQHTVPNVFI**G**GKH**I**GGCTD**T**VKLYRK**G**ELE**P**LLSEASTRK**T**S 179  
 Cm 74 SFGSRLEESVKTITQNPVVVYSK**W**CSYSSEV**K**L**F**FKRLGV**Q**PLVIELDELGPQGP**Q**LQVLE**R**L**T**GQHTVPNVFI**G**GKH**I**GGCTD**T**VKLYRK**G**ELE**L**MLSEANAKH**S**E 184  
 La 58 SFGSRLEETIKKTVSDNPVVVYSK**W**CSYSSEVKS**L**FKKL**G**AD**P**LVFELDEMGAQGP**Q**LQVLE**R**L**T**GQHTVPNVFI**G**G**H**I**G**GCTD**T**LKLYR**N**GELE**P**LLSKAKAK**N**T-- 166  
 Gm 56 SFGSRLEDTIKKTVANPVVVYSK**W**CTYSSEV**K**L**F**FKKLGV**D**PLV**F**ELDEMGPQGP**Q**LQVLE**R**L**T**GQHTVPNVFI**G**GKH**I**GGCTD**T**LKLYRK**G**ELE**P**LLSEANAK**K**T**S** 166  
 Os 54 SFGSRMEDSVKRTLADNPVVIYSK**W**CSYSMEV**K**L**F**FKRIGV**Q**PHVIELDQLGAQGP**Q**LQVLE**R**L**T**GQSTVPNVFI**G**GKH**I**GGCTD**T**VK**L**HR**G**EL**A**T**M**LSELDIDV**N**NS 164  
 Sb 60 SFGSRMEDSVKTVADNPVVIYSK**W**CSYSMEV**K**L**F**FKRIGV**Q**PHVIELDHLGAQGP**Q**LQVLE**R**L**T**GQ**T**VPNVFI**G**GKH**V**GGCTD**T**VKLYRK**G**E**L**AS**M**LSDLDIN**I**NS 170  
 Zm 57 SFGSRMEDSVKTVADNPVVIYSK**W**CSYSMEV**K**L**F**FKRIGV**Q**PHVIELDNLGAQGP**Q**LQVLE**R**L**T**GQSTVPNVFI**G**GKH**V**GGCTD**T**VKLYRK**G**E**L**AS**M**LSDLDIN**I**DNS 167  
 Gh 59 SFGSRLEESVKKTVASNPVVVYSK**W**CSYSSEVKS**L**FKKL**G**VE**P**LVIELDEMGAQGP**Q**V**Q**K**L**LE**R**L**T**GQHTVPNVFI**G**GKH**I**GGCTD**T**VKLYR**R**GELE**P**LLSEATA**K**SK**E**N 169

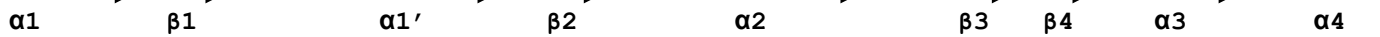

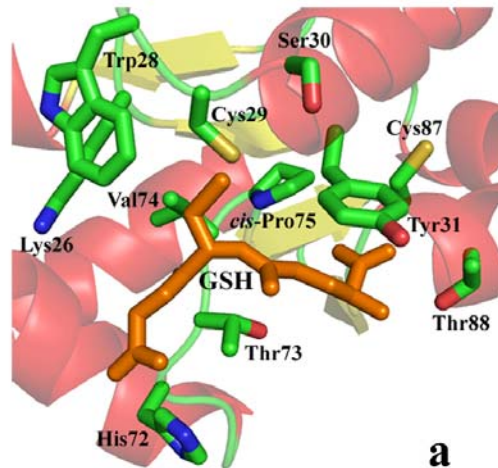**a**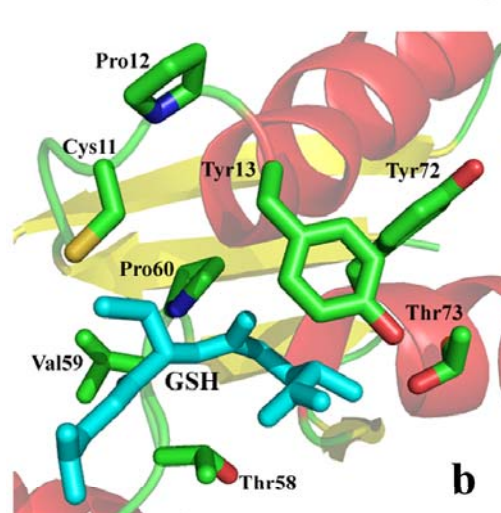**b**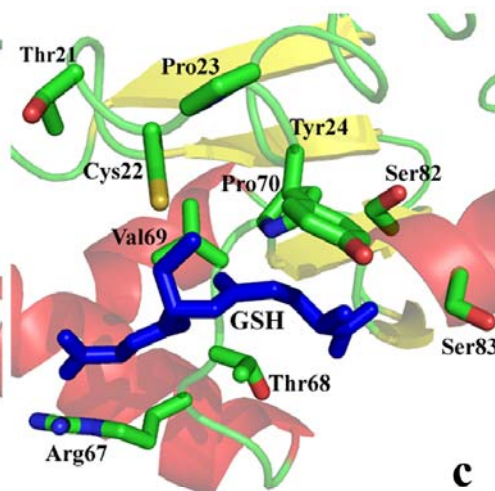**c**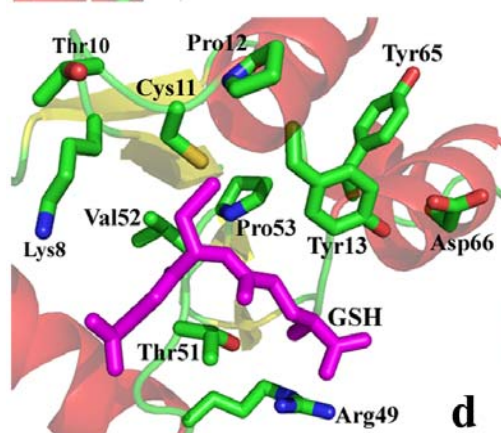**d**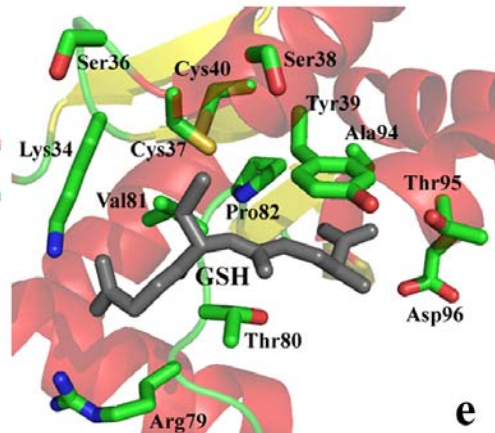**e**

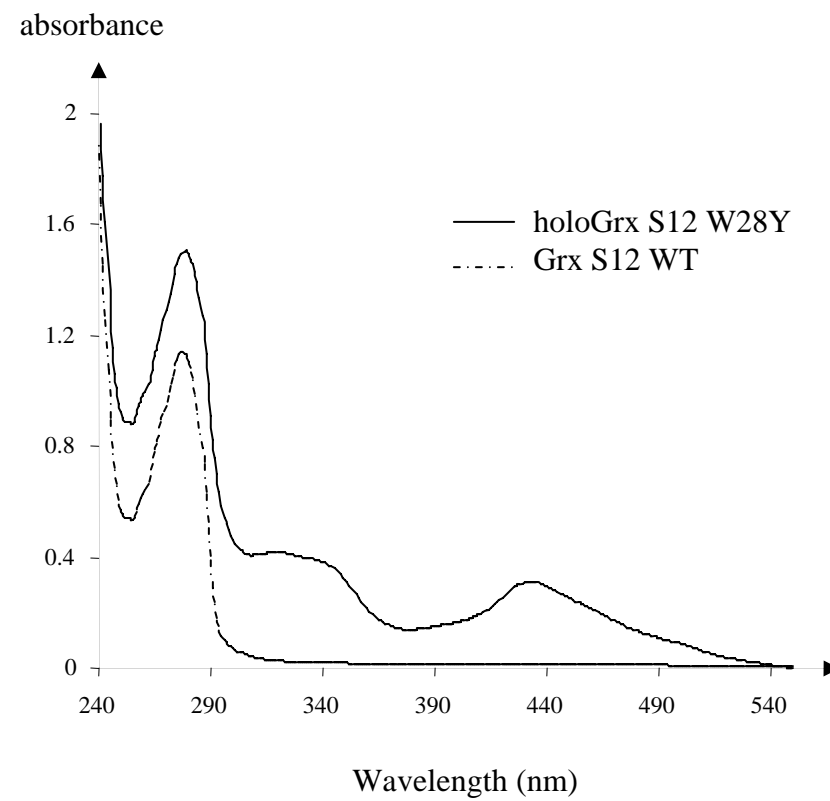

Supplement: M807998200_1.pdf [file M807998200_1.pdf]
